# Supplementary material for: Analysis of single algal cells by combining mass spectrometry with Raman and fluorescence mapping
Source: Royal Society of Chemistry journal article supplement (doi:10.1039/c3an01135f), 2013-01-01

**A**

**Connector**

**Syringe pump**

**Capillary**

**MAMS Chip**

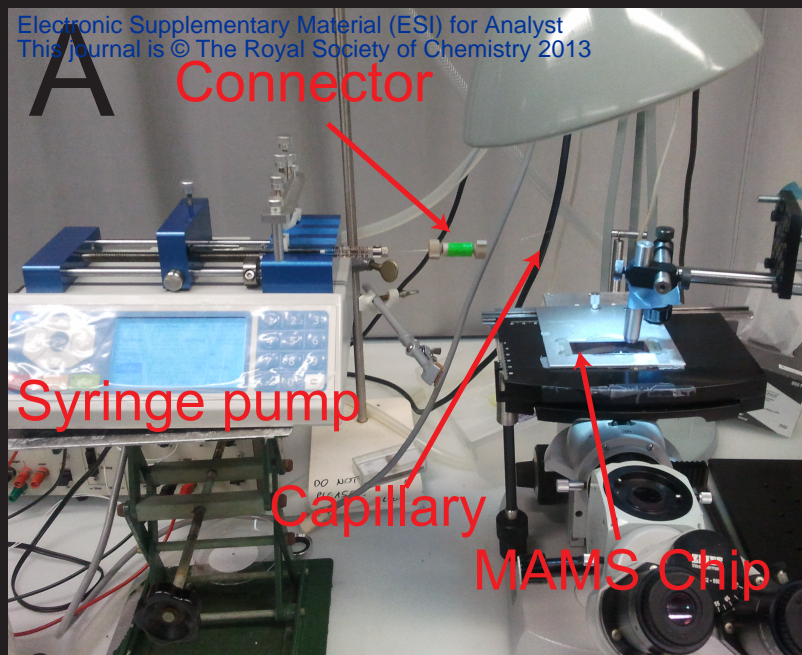

**B**

**Metal arm  
on z-stage**

**Matrix**

**Tape  
fixating  
capillary**

**Movable  
x-y stage**

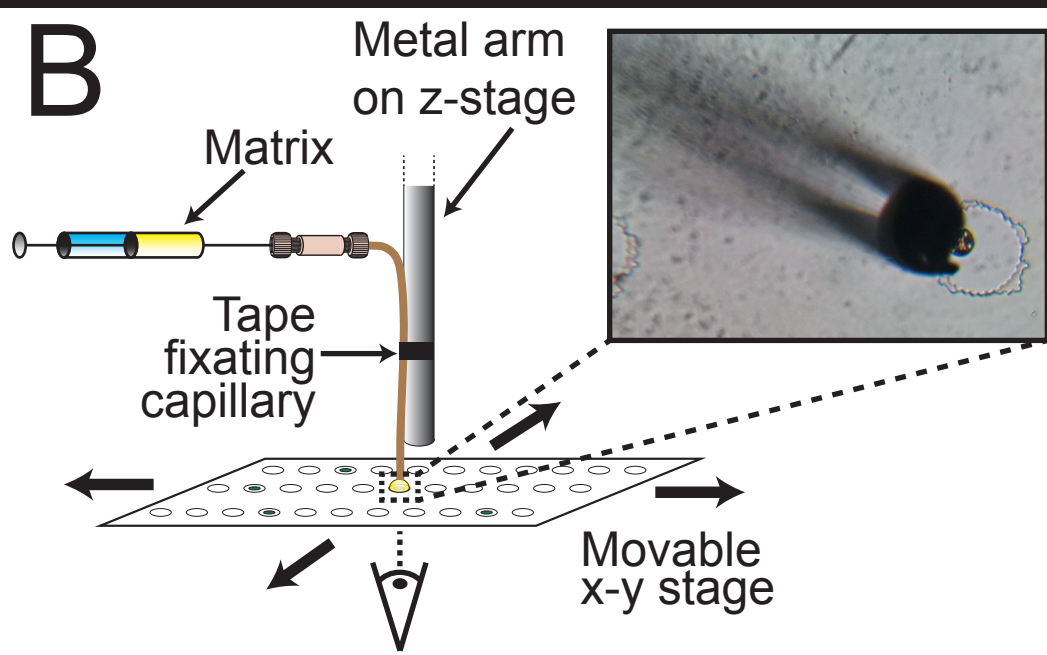

Supplement: c3an01135f_2.pdf [file c3an01135f_2.pdf]
