# Supplementary figures and images for: Analysis of single algal cells by combining mass spectrometry with Raman and fluorescence mapping
Source: Royal Society of Chemistry journal article supplement (doi:10.1039/c3an01135f), 2013-01-01

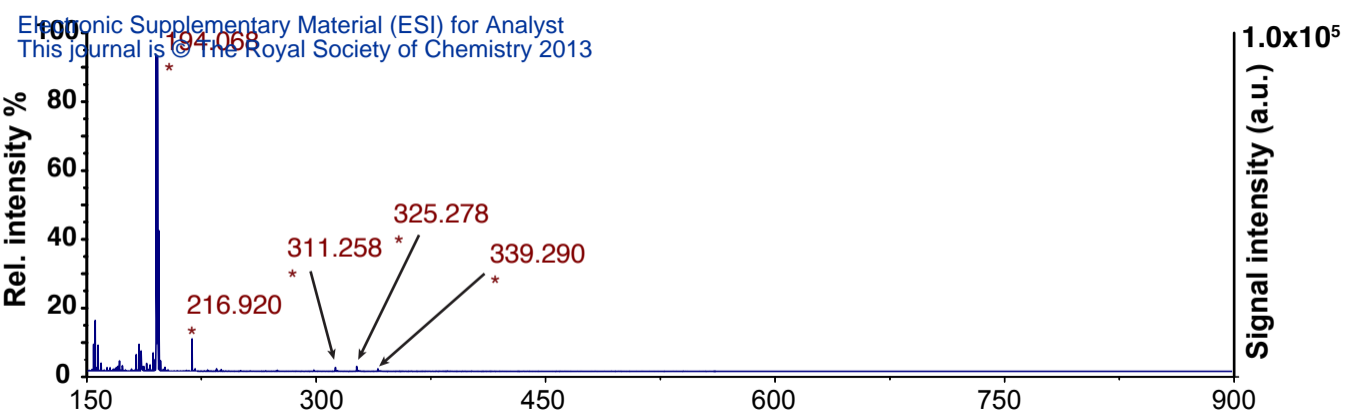

Supplement: c3an01135f_6.pdf [file c3an01135f_6.pdf]

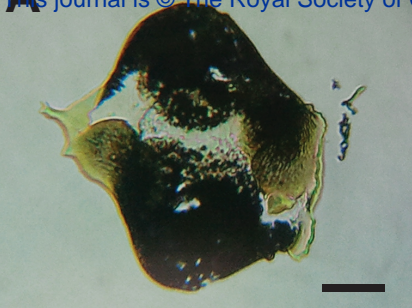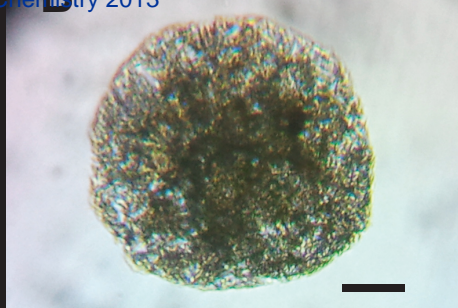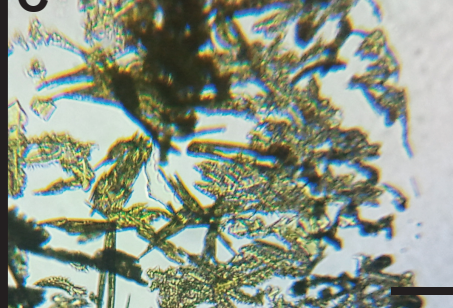

Supplement: c3an01135f_7.pdf [file c3an01135f_7.pdf]
